# Supplementary material for: Effects of dexmedetomidine on immune response in patients undergoing radical and reconstructive surgery for oral cancer
Source: PubMed Central journal article supplement — Oncol Lett. 2020 Dec 10;21(2):106. doi: 10.3892/ol.2020.12367 (PMC7751342; doi:10.3892/ol.2020.12367), 2020-12-10

Figure S1. Gating strategy for the identification of CD3<sup>+</sup> T cells in the PBMCs of oral cancer patients. Cells were identified by (A) SSC and (B) FSC to gate single cells. (C) Dead cells were excluded by staining with FVD. (D) Lymphocytes were gated by SSC-A and FSC-A. (E) CD45 and (F, top) CD3 antibodies were used to stain CD45<sup>+</sup>CD3<sup>+</sup> T cells. (F, bottom) Gates were based on the isotype control. FSC, forward scatter. FVD, Fixable Viability Dye. PBMC, peripheral blood mononuclear cell. SSC, side scatter.

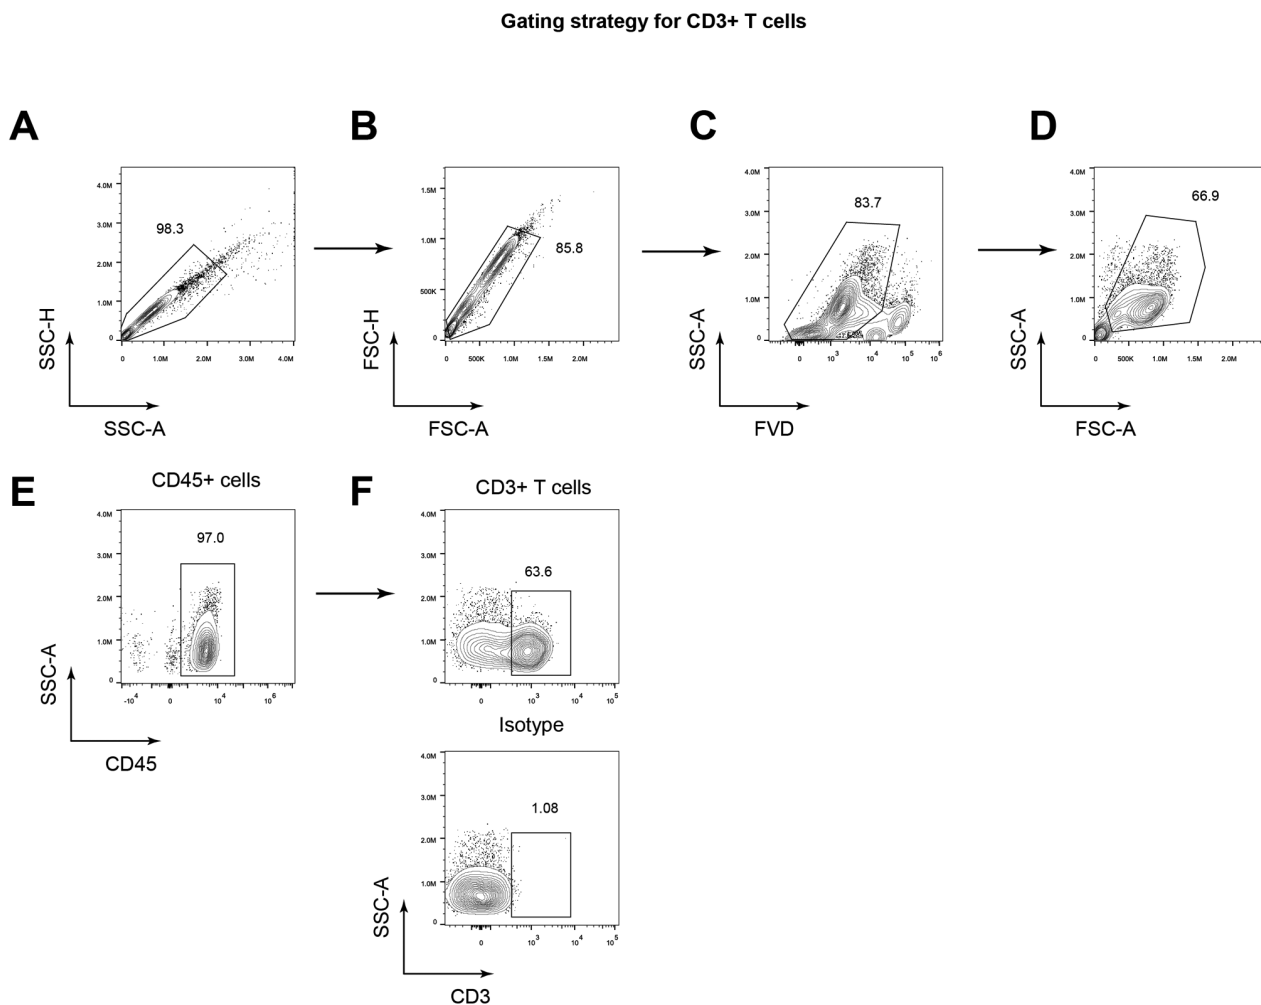

Supplement: Supplementary_Data.pdf [file Supplementary_Data.pdf]
